# Supplementary material for: Positional isomerism of unsymmetrical semirigid ligands toward the construction of discrete and infinite coordination architectures of zinc(ii) and cadmium(ii) complexes
Source: Royal Society of Chemistry journal article supplement (doi:10.1039/c3ce42398k), 2014-01-01
Supplement: c3ce42398k1.pdf [file c3ce42398k1.pdf]

Supporting Information for

**Positional isomerism of unsymmetrical semirigid ligands toward the construction of discrete and infinite coordination architectures of zinc(II) and cadmium(II) complexes**

**Jing-Yun Wu,\* Pin-Ting Yuan and Cheng-Chu Hsiao**

Department of Applied Chemistry, National Chi Nan University, Nantou 545, Taiwan. Fax: +886-49-2917956. E-mail: [jyunwu@ncnu.edu.tw](mailto:jyunwu@ncnu.edu.tw)

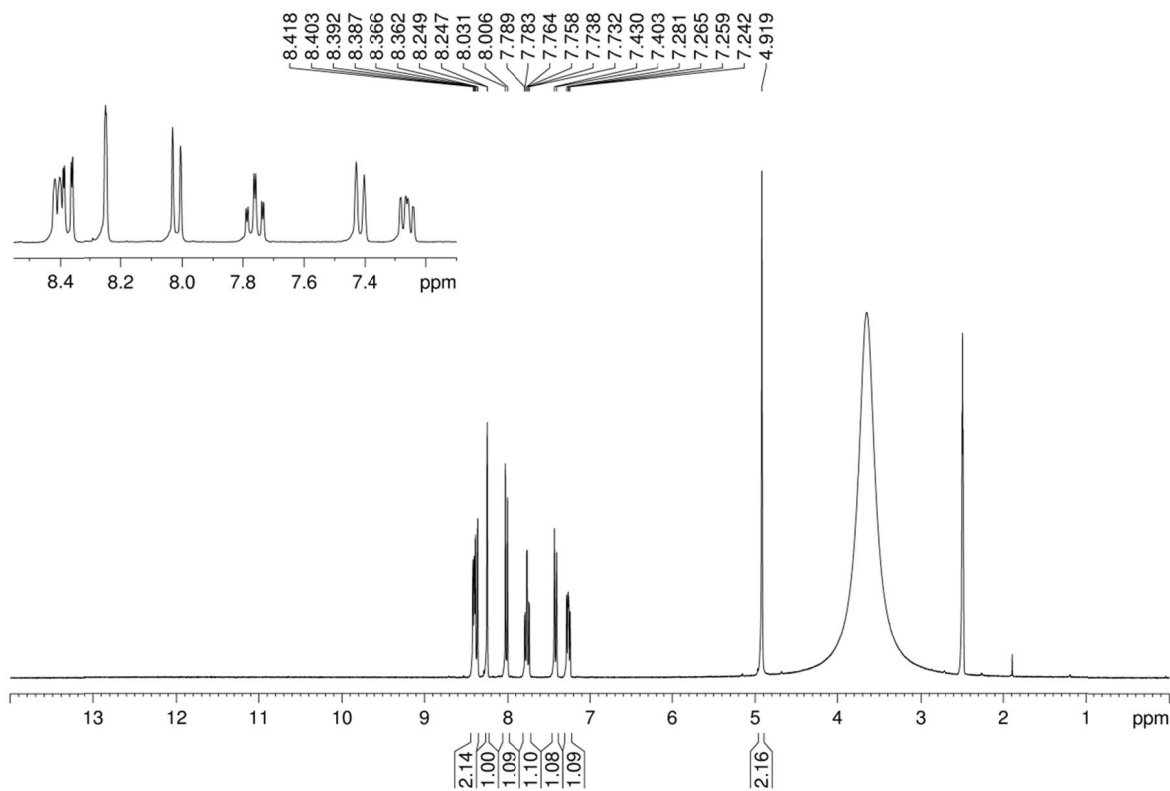

**Fig. S1**  $^1\text{H}$  NMR spectrum of 2-(2-pyridylmethyl)-1,3-dioxisoindoline-5-carboxylic acid (HInMe-2-py) in  $\text{DMSO-}d_6$  at room temperature.

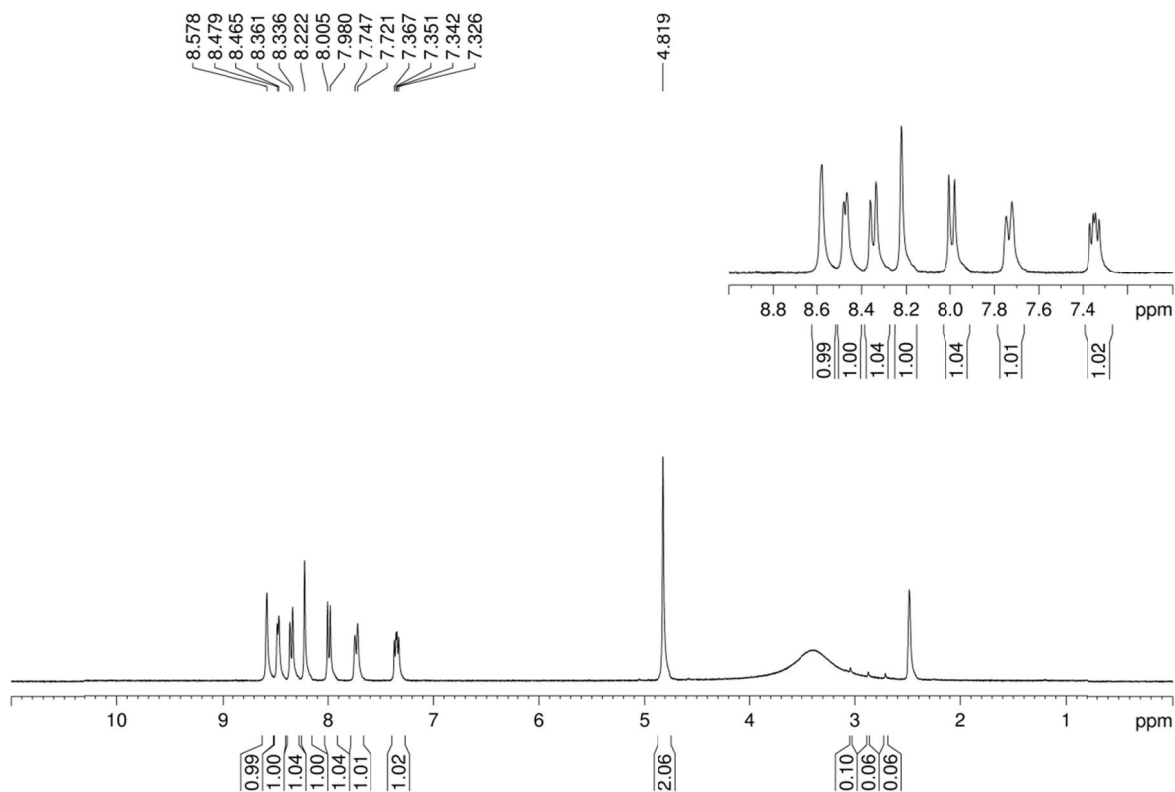

**Fig. S2**  $^1\text{H}$  NMR spectrum of 2-(3-pyridylmethyl)-1,3-dioxisoindoline-5-carboxylic acid (HInMe-3-py) in  $\text{DMSO-}d_6$  at room temperature.

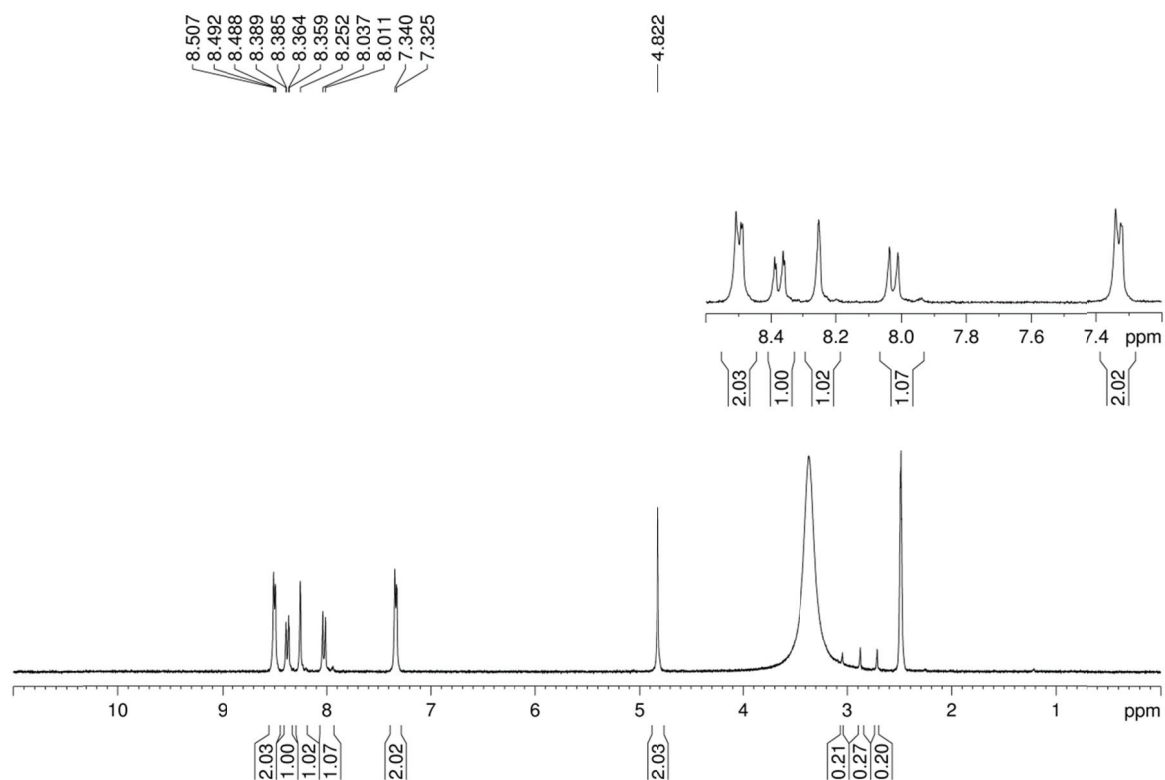

**Fig. S3**  $^1\text{H}$  NMR spectrum of 2-(4-pyridylmethyl)-1,3-dioxisoindoline-5-carboxylic acid (HInMe-4-py) in  $\text{DMSO-}d_6$  at room temperature.

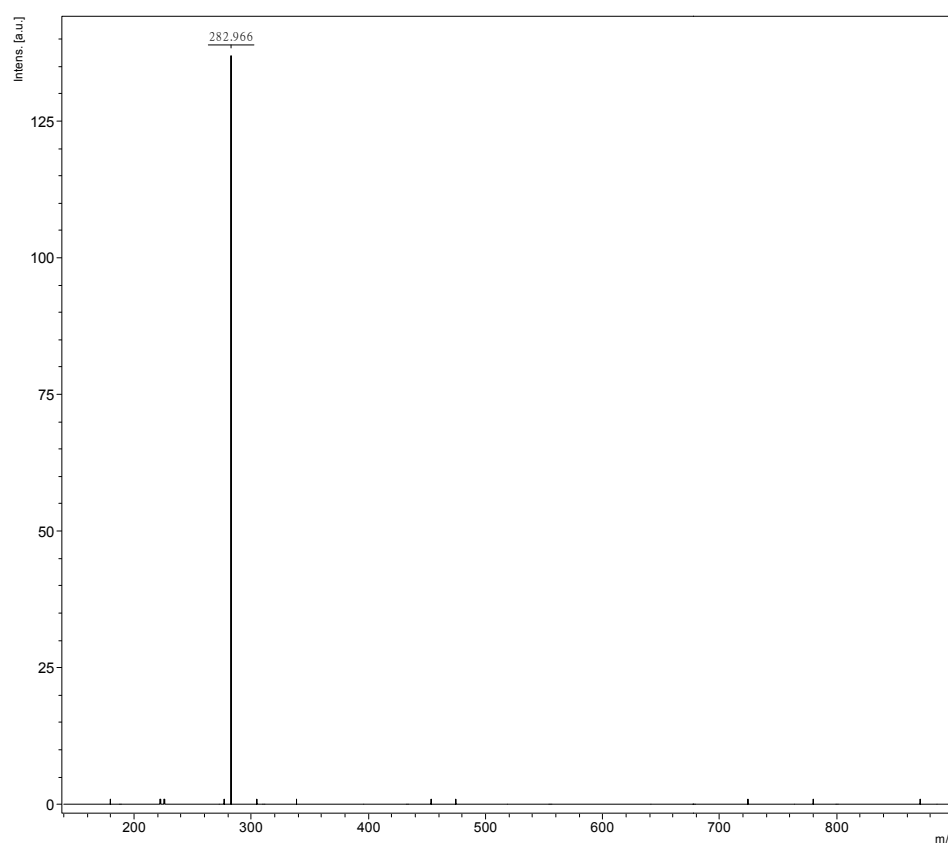

**Fig. S4** Matrix-assisted laser desorption/ionization time of flight (MALDI-TOF) mass spectrum of 2-(2-pyridylmethyl)-1,3-dioxisoindoline-5-carboxylic acid (HInMe-2-py).

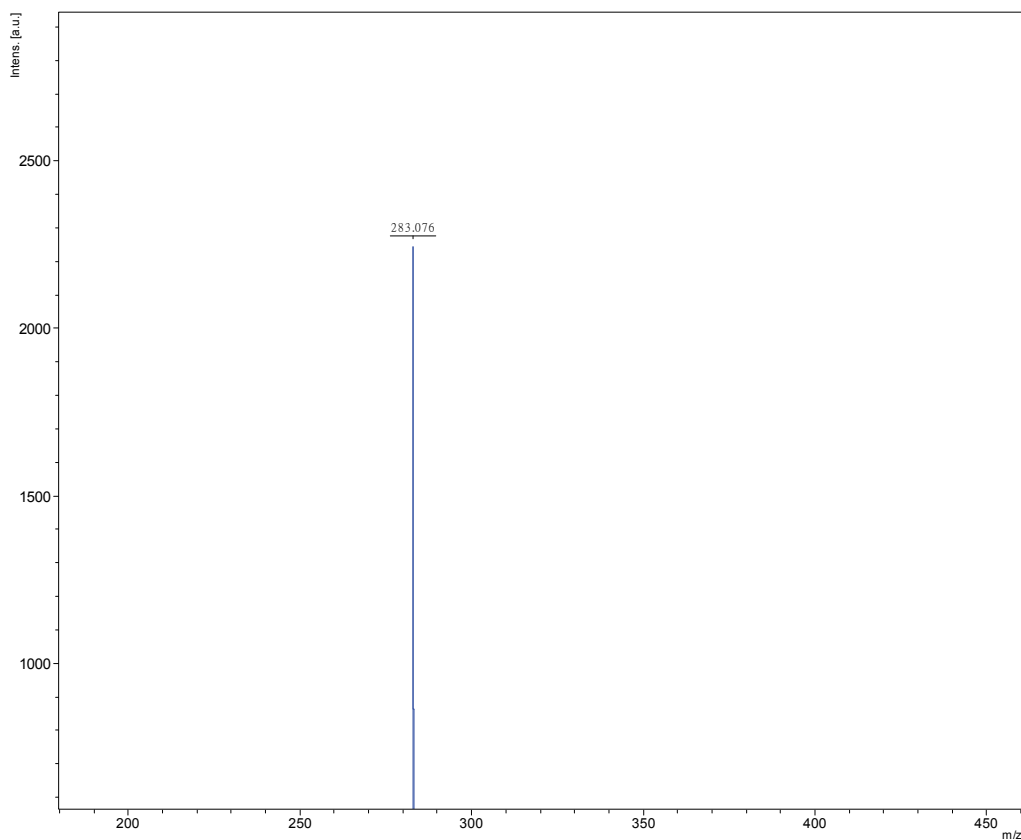

**Fig. S5** Matrix-assisted laser desorption/ionization time of flight (MALDI-TOF) mass spectrum of 2-(3-pyridylmethyl)-1,3-dioxisoindoline-5-carboxylic acid (HInMe-3-py).

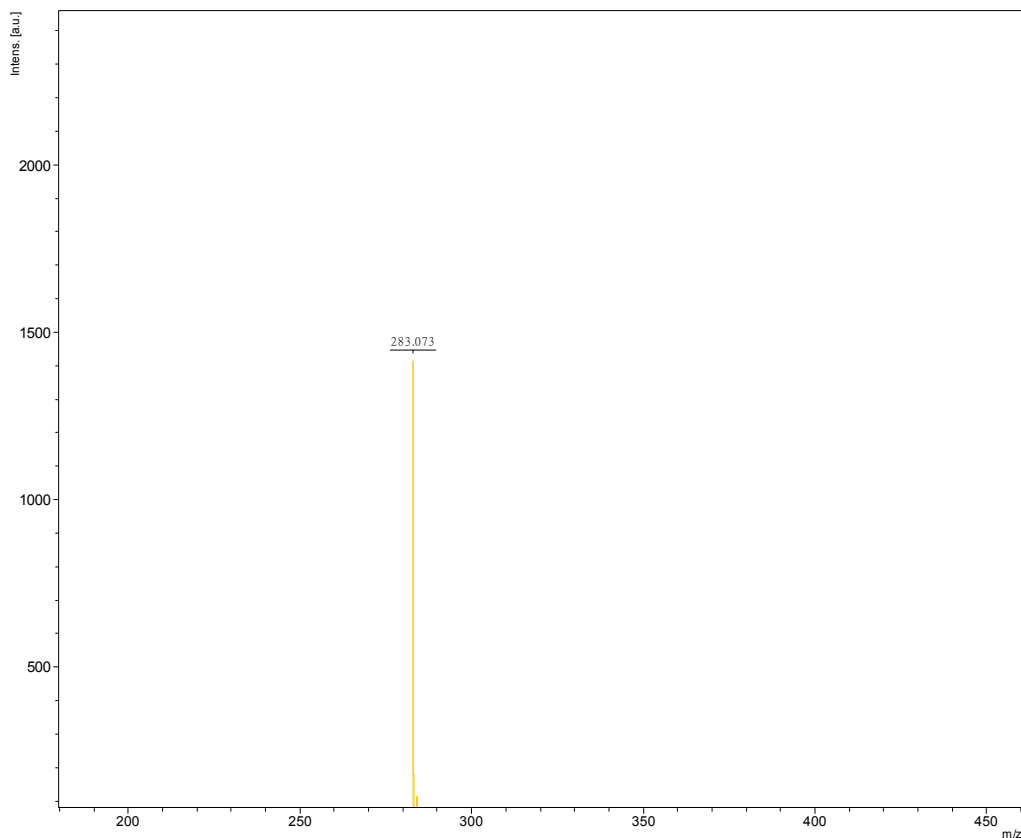

**Fig. S6** Matrix-assisted laser desorption/ionization time of flight (MALDI-TOF) mass spectrum of 2-(4-pyridylmethyl)-1,3-dioxisoindoline-5-carboxylic acid (HInMe-4-py).

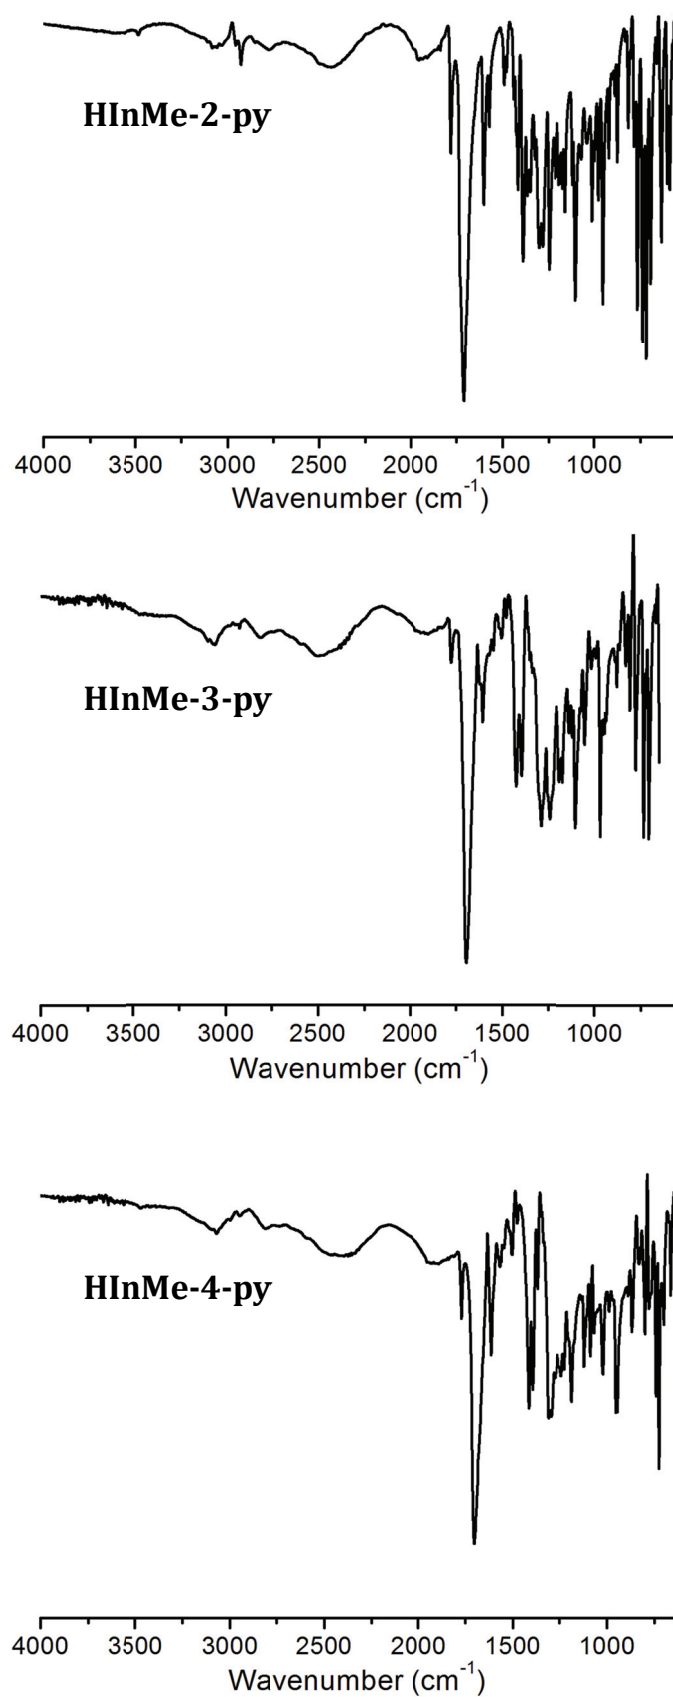

**Fig. S7** Infrared (IR) spectra of HInMe-*n*-py (*n* = 2, 3, 4) ligands.

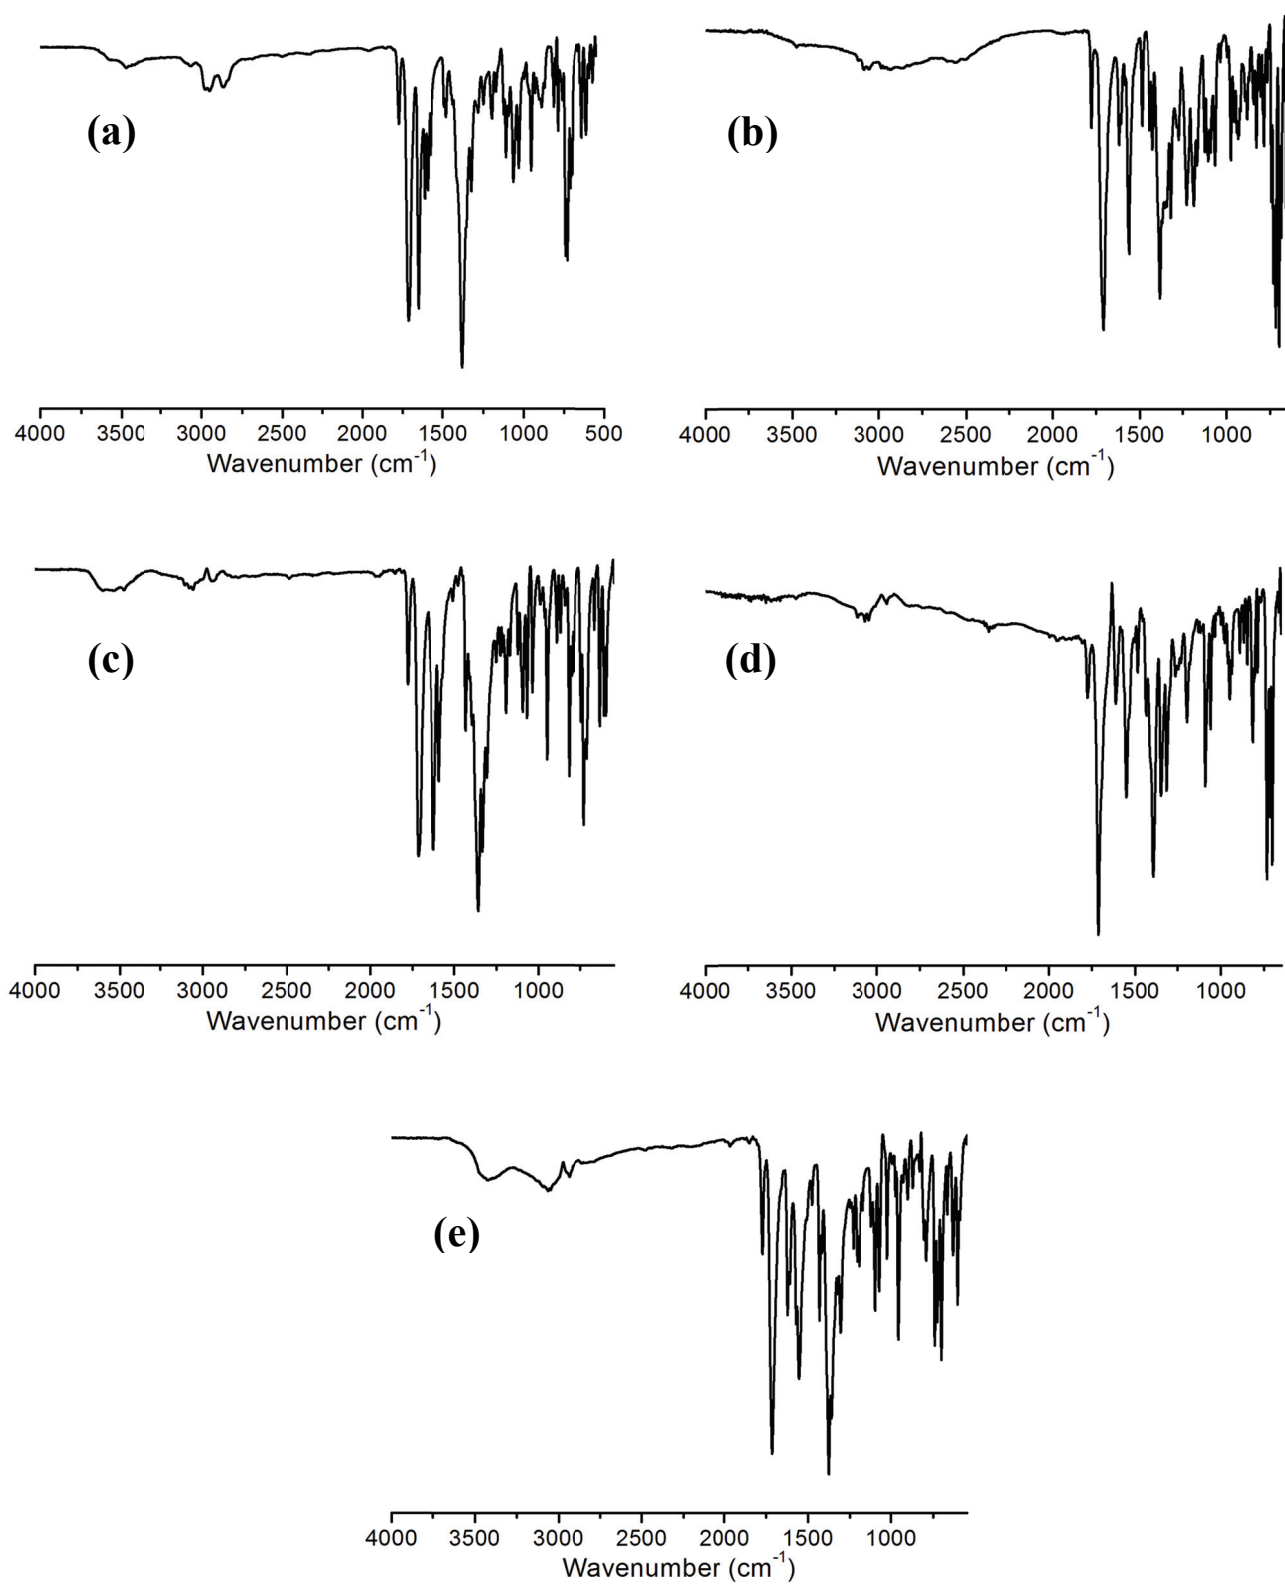

**Fig. S8** Infrared (IR) spectra of (a-e) 1-5.

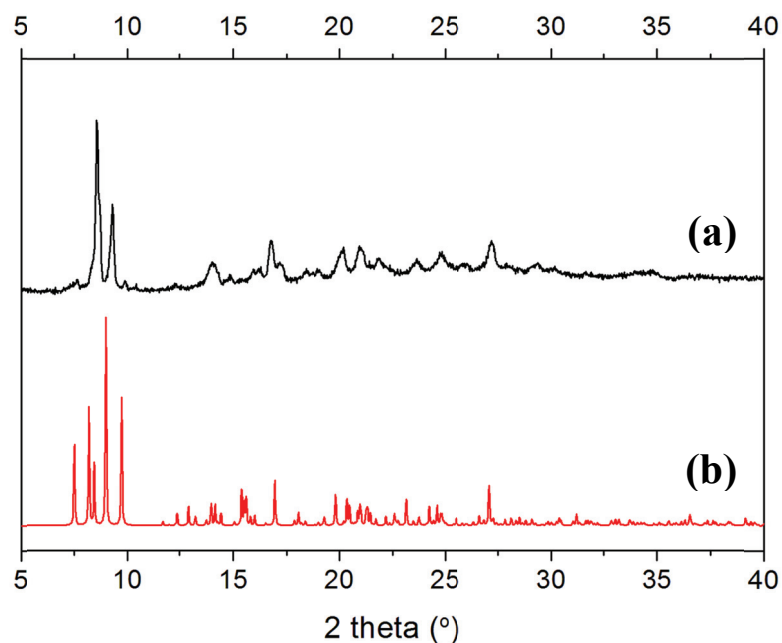

**Fig. S9** X-Ray powder diffraction (XRPD) patterns of **1**: (a) a freshly grounded sample at room temperature; (b) simulated from the single-crystal data. For **1**, it is difficult to obtain a well-resolved XRPD pattern that is well-matched with the simulated XRPD patterns since lattice solvent molecules are gradually released during the XRPD measurement.

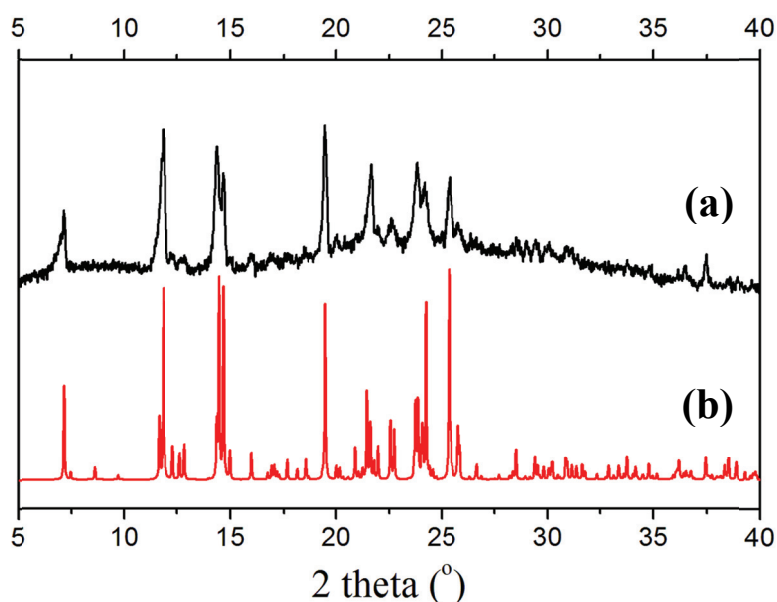

**Fig. S10** X-ray powder diffraction (XRPD) patterns of **2**: (a) a freshly grounded sample at room temperature; (b) simulated from the single-crystal data.

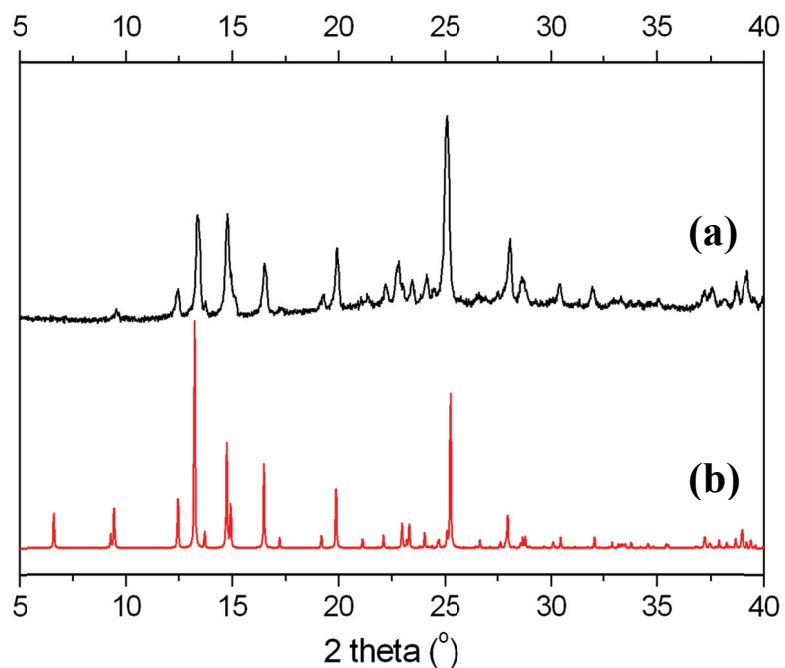

**Fig. S11** X-Ray powder diffraction (XRPD) patterns of **3**: (a) a freshly grounded sample at room temperature; (b) simulated from the single-crystal data.

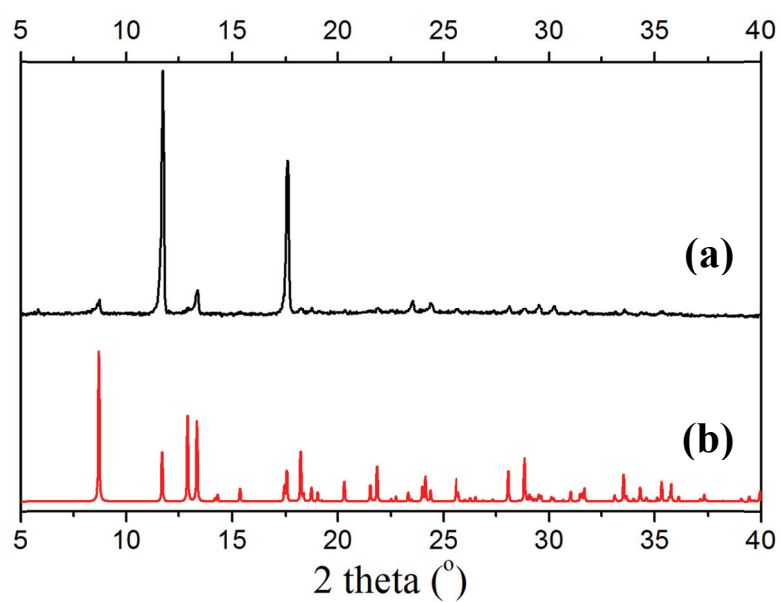

**Fig. S12** X-Ray powder diffraction (XRPD) patterns of **4**: (a) a freshly grounded sample at room temperature; (b) simulated from the single-crystal data.



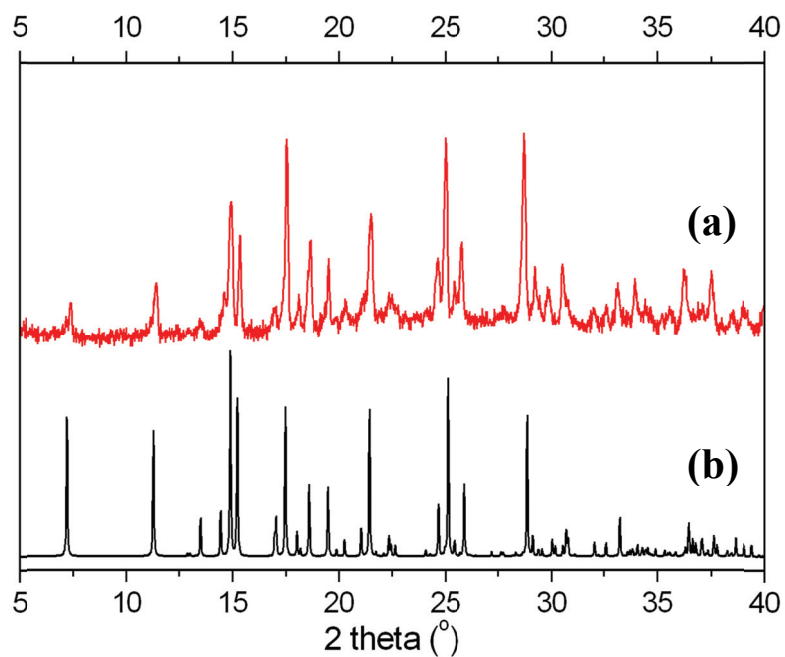

**Fig. S13** X-Ray powder diffraction (XRPD) patterns of **5**: (a) a freshly grounded sample at room temperature; (b) simulated from the single-crystal data.

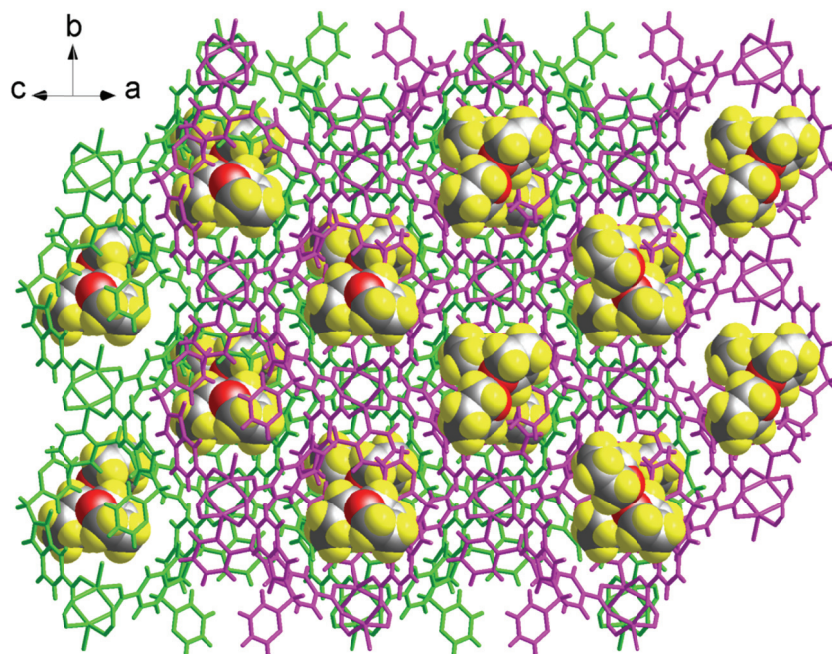

**Fig. S14** Crystal packing of **1**, showing the lattice THF molecules (space-filling model) are accommodated within the cavities.

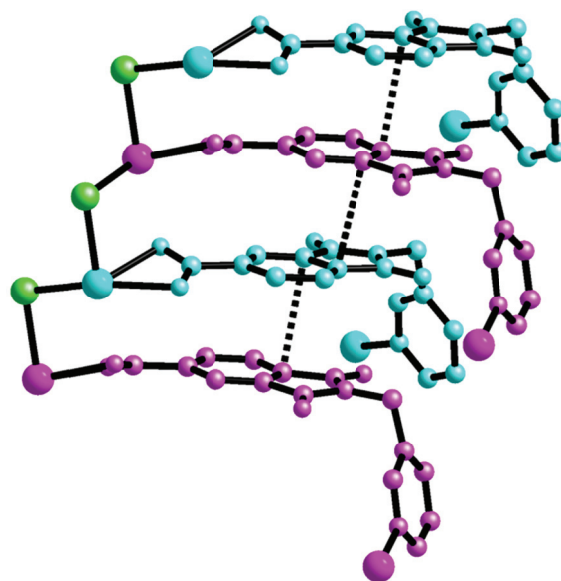

**Fig. S15** Representation of the inter-helix  $\pi\cdots\pi$  interactions (dashed lines, the shortest atom $\cdots$ atom distance: 3.3106(17) Å in **4**. Carbon-bound hydrogen atoms are omitted for clarity.

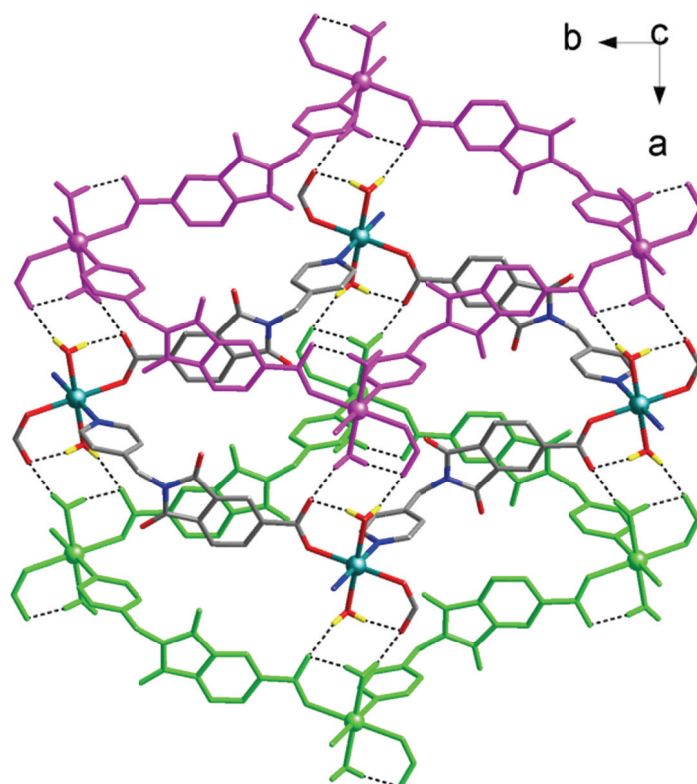

**Fig. S16** Crystal packing of **5**, showing the three-dimensional hydrogen-bonded supramolecular net formed by net-to-net aqua-carboxylate hydrogen bonds (dashed lines). Carbon-bound hydrogen atoms are omitted for clarity.

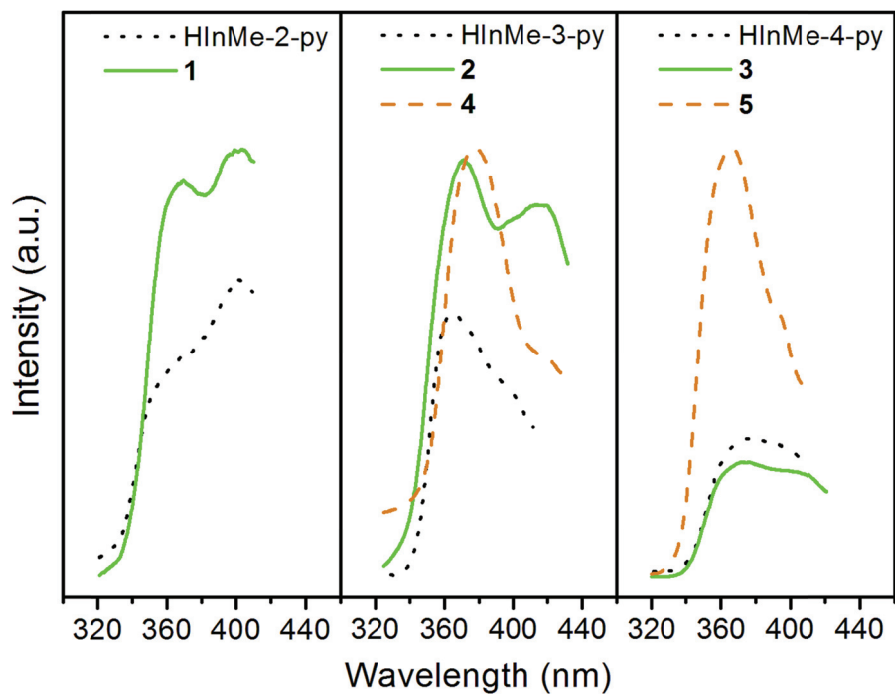

**Fig. S17** Solid-state excitation spectra of HInMe- $n$ -py ( $n = 2, 3, 4$ ) ligands and compounds **1–5** at room temperature. *Note:*  $\lambda_{em} = 450$  nm for HInMe- $n$ -py ( $n = 2, 3, 4$ ) ligands and **1**,  $\lambda_{em} = 470$  nm for **2** and **4**,  $\lambda_{em} = 460$  nm for **3**, and  $\lambda_{em} = 425$  nm for **5**.
